# Supplementary material for: In situsequential U–Pb age and Sm–Nd systematics measurements of natural LREE-enriched minerals using single laser ablation multi-collector inductively coupled plasma mass spectrometry
Source: Royal Society of Chemistry journal article supplement (doi:10.1039/c9ja00346k), 2019-12-09
Supplement: c9ja00346k1.xlsx [file c9ja00346k1.xlsx]

## Sheet: Jefferson
Sample	Isotope Ratio							Age (Ma)							Nd isotope
	207Pb/206Pb	1σ (abs)	207Pb/235U	1σ (abs)	206Pb/238U	1σ (abs)	Rho	207Pb/206Pb	1σ (abs)	207Pb/235Ua	1σ (abs)	206Pb/238U	1σ (abs)	Concordance	147Sm/144Nd	2σ (abs)	143Nd/144Nd	2σ (abs)	143Nd/144Nd (Initial) @364Ma	2σ (abs)
			Ratio		Ratio					Ratio		Ratio
Jefferson01	0.054002	0.00120052	0.455404	0.0100541	0.0610574	0.000924982	0.686197	372.275	49.995	381.057	7.01917	382.053	5.62348	1.00261	0.506517	8.55678e-05	0.513098	4.32712e-05	0.51189	4.30673e-05
Jefferson02	0.0550754	0.000878321	0.457431	0.00740522	0.0601128	0.000918327	0.943666	416.715	30.5525	382.47	5.16572	376.312	5.58793	0.983898	0.507648	0.00011751	0.513083	3.7826e-05	0.511873	3.7546e-05
Jefferson03	0.0540894	0.000932218	0.456471	0.00787359	0.0610782	0.000917643	0.871019	375.98	34.255	381.8	5.49523	382.179	5.57881	1.00099	0.508782	0.000125897	0.513075	3.94957e-05	0.511862	3.91956e-05
Jefferson04	0.054352	0.000887546	0.455298	0.00744105	0.0606298	0.000914889	0.923302	387.09	35.1825	380.983	5.19819	379.454	5.56439	0.995989	0.508203	0.000143368	0.513107	4.44584e-05	0.511895	4.41167e-05
Jefferson05	0.0545567	0.000904778	0.459982	0.00762946	0.0610199	0.000917306	0.906336	394.495	32.405	384.245	5.31254	381.825	5.57706	0.993702	0.506995	0.000148112	0.513041	4.3707e-05	0.511833	4.33539e-05
Jefferson06	0.0546172	0.000924801	0.458712	0.00786786	0.0607749	0.000919563	0.882145	398.2	34.255	383.361	5.48288	380.337	5.59203	0.99211	0.507363	0.000114459	0.513095	3.82461e-05	0.511886	3.79733e-05
Jefferson07	0.0553847	0.000926445	0.456245	0.00768001	0.059615	0.00089991	0.896767	427.825	37.035	381.643	5.36126	373.283	5.47852	0.978097	0.507592	0.000112676	0.513084	3.72896e-05	0.511875	3.7021e-05
Jefferson08	0.0542961	0.000903675	0.454648	0.00754933	0.0605994	0.000910023	0.904381	383.385	37.035	380.529	5.27598	379.27	5.53499	0.996691	0.505543	0.000213588	0.513057	4.13983e-05	0.511852	4.08892e-05
Jefferson09	0.0545604	0.000919967	0.459795	0.00779271	0.0609817	0.000917842	0.888064	394.495	32.405	384.115	5.42663	381.593	5.58052	0.993433	0.506858	0.00010571	0.513075	3.8686e-05	0.511867	3.84341e-05
Jefferson10	0.054866	0.00092185	0.46124	0.00771012	0.0608403	0.00091347	0.89819	405.605	37.035	385.12	5.36399	380.734	5.55469	0.988611	0.50637	0.000109442	0.513067	3.86524e-05	0.51186	3.83916e-05
Jefferson11	0.0546109	0.000908546	0.457629	0.00769718	0.0606342	0.000914219	0.896425	394.495	32.405	382.608	5.36816	379.481	5.5603	0.991829	0.50886	0.000295736	0.513059	4.0892e-05	0.511846	4.01871e-05
Jefferson12	0.0553145	0.000910637	0.466431	0.0077799	0.0610195	0.000926751	0.910559	433.38	37.0325	388.721	5.39342	381.823	5.63442	0.982255	0.506213	9.58021e-05	0.513082	4.15197e-05	0.511876	4.12913e-05
Jefferson13	0.0547881	0.000905997	0.463861	0.00770684	0.0612667	0.000921581	0.905358	466.71	37.0325	386.939	5.35219	383.324	5.60175	0.990657	0.506041	0.00015088	0.51309	4.05072e-05	0.511884	4.01476e-05
Jefferson14	0.0546877	0.000891734	0.463604	0.00755383	0.06135	0.000921861	0.922211	398.2	37.0325	386.761	5.24711	383.831	5.60302	0.992423	0.507549	9.19376e-05	0.513084	4.07255e-05	0.511874	4.05064e-05
Jefferson15	0.0546937	0.000907225	0.463663	0.0076915	0.06135	0.000921313	0.905283	398.2	37.0325	386.802	5.34228	383.83	5.5997	0.992317	0.507351	0.000169469	0.513027	4.05944e-05	0.511818	4.01905e-05
Jefferson16	0.0553721	0.000908966	0.468775	0.00768047	0.0612735	0.000924764	0.92116	427.825	37.035	390.343	5.31624	383.366	5.62104	0.982126	0.508275	0.000105571	0.513047	4.24761e-05	0.511836	4.22245e-05
Jefferson17	0.0548764	0.000922661	0.46056	0.00786778	0.0607307	0.000922079	0.888779	405.605	37.035	384.648	5.47594	380.068	5.60754	0.988093	0.506014	0.000140578	0.513041	4.28434e-05	0.511835	4.25083e-05
Jefferson18	0.0548423	0.000921116	0.46191	0.00778264	0.06095	0.00091533	0.891321	405.605	37.035	385.585	5.41186	381.401	5.56543	0.989147	0.508422	0.000129669	0.513069	4.3612e-05	0.511858	4.3303e-05
Jefferson19	0.0547799	0.000906023	0.461767	0.0076338	0.0610042	0.000915717	0.907995	466.71	37.0325	385.486	5.30912	381.729	5.5675	0.990255	0.507313	0.000130313	0.513017	4.54091e-05	0.511807	4.50985e-05
Jefferson20	0.0542472	0.000924118	0.457329	0.00785213	0.0610049	0.000918257	0.876678	388.94	38.885	382.399	5.47709	381.734	5.58292	0.998262	0.506375	8.65865e-05	0.513021	4.30644e-05	0.511814	4.2858e-05
Jefferson21	0.0552346	0.000981041	0.46427	0.00831725	0.0608231	0.000916481	0.841097	420.42	36.1075	387.223	5.77352	380.629	5.57307	0.98297	0.507783	0.000137795	0.513047	4.13562e-05	0.511837	4.10278e-05
Jefferson22	0.0545637	0.000905948	0.458564	0.00765456	0.0608181	0.000915931	0.902214	394.495	32.405	383.259	5.33511	380.599	5.56975	0.993059	0.508914	0.000115277	0.513065	4.02905e-05	0.511852	4.00157e-05
Jefferson23	0.0544419	0.000947847	0.462464	0.00804156	0.0614764	0.000923344	0.863758	390.79	38.885	385.97	5.58939	384.598	5.61137	0.996446	0.510499	0.000146138	0.51305	3.87955e-05	0.511834	3.84472e-05
Jefferson24	0.054079	0.00100291	0.456789	0.00847066	0.0611285	0.000919131	0.810834	375.98	42.5875	382.023	5.90977	382.485	5.58759	1.00121	0.50722	0.000124909	0.513056	4.56123e-05	0.511847	4.53145e-05

## Sheet: Diamantina
Sample	Isotope Ratio							Age (Ma)							Nd isotope
	207Pb/206Pb	1σ (abs)	207Pb/235U	1σ (abs)	206Pb/238U	1σ (abs)	Rho	207Pb/206Pb	1σ (abs)	207Pb/235Ua	1σ (abs)	206Pb/238U	1σ (abs)	Concordance	147Sm/144Nd	2σ (abs)	143Nd/144Nd	2σ (abs)	143Nd/144Nd(Initial) @ 495Ma	2σ (abs)
			Ratio		Ratio					Ratio		Ratio
Diama 01	0.0565385	0.000643549	0.623205	0.00707887	0.0797943	0.00040706	0.449111	472.265	21.295	491.854	4.44074	494.895	2.44481	0.99	0.128166	2.13008e-05	0.511428	3.54346e-05	0.511012	3.53656e-05
Diama 02	0.0574378	0.000585011	0.631303	0.00649218	0.0795545	0.000404399	0.494303	509.3	22.22	496.907	4.05507	493.463	2.42947	0.99	0.128049	2.15213e-05	0.511441	3.17066e-05	0.511025	3.16368e-05
Diama 03	0.0571938	0.00064095	0.622632	0.00698301	0.0788076	0.000402435	0.45532	498.19	24.07	491.496	4.38247	489.002	2.41921	0.99	0.127715	2.24473e-05	0.511429	2.58902e-05	0.511015	2.58175e-05
Diama 04	0.0562497	0.00193947	0.615364	0.0212018	0.079204	0.00042073	0.154176	461.155	108.32	486.938	13.3311	491.37	2.52712	0.99	0.124453	3.0238e-05	0.511432	2.76274e-05	0.511029	2.75293e-05
Diama 05	0.0562223	0.000746443	0.616234	0.00816108	0.0793459	0.000403791	0.384264	461.155	34.255	487.484	5.13783	492.217	2.42625	0.99	0.124769	2.02186e-05	0.511426	2.80519e-05	0.511022	2.79863e-05
Diama 06	0.0574036	0.000899491	0.626967	0.01012	0.0790495	0.00041022	0.321501	505.595	35.1825	494.205	6.32479	490.447	2.46499	0.99	0.128047	1.71567e-05	0.511447	2.19153e-05	0.511032	2.18597e-05
Diama 07	0.057091	0.000562569	0.62946	0.00623243	0.0798071	0.00040424	0.511575	494.485	22.22	495.76	3.89828	494.971	2.42806	0.99	0.128438	2.19544e-05	0.511448	4.24374e-05	0.511032	4.23662e-05
Diama 08	0.0574409	0.000724012	0.6301	0.00791388	0.0794027	0.000401068	0.402163	509.3	60.1775	496.158	4.94106	492.557	2.40998	0.99	0.127683	1.903e-05	0.511445	2.29836e-05	0.511031	2.29219e-05
Diama 09	0.0568661	0.00105631	0.62501	0.0116389	0.0795877	0.000413242	0.278826	487.08	36.1075	492.983	7.28026	493.661	2.4819	0.99	0.125512	4.3027e-05	0.511428	3.9144e-05	0.511021	3.90045e-05
Diama 10	0.0584063	0.000998574	0.643934	0.0110201	0.0798775	0.000410282	0.300133	546.33	38.8825	504.739	6.81525	495.392	2.46377	0.98	0.126537	2.96017e-05	0.511445	3.5591e-05	0.511035	3.5495e-05
Diama 11	0.0571012	0.00135601	0.633104	0.015108	0.0802929	0.000423507	0.221029	494.485	51.845	498.027	9.39954	497.871	2.54144	0.99	0.123628	3.08811e-05	0.511434	3.13616e-05	0.511033	3.12614e-05
Diama 12	0.0570007	0.000987087	0.627605	0.0108471	0.0798207	0.000416864	0.30217	500.04	37.0325	494.603	6.77532	495.052	2.50295	0.99	0.125569	2.47295e-05	0.51144	2.94132e-05	0.511033	2.9333e-05
Diama 13	0.0570301	0.00101188	0.630678	0.0112183	0.0802194	0.000442936	0.310416	500.04	38.885	496.518	6.99348	497.432	2.65692	0.99	0.128543	3.19419e-05	0.511457	4.41234e-05	0.51104	4.40198e-05
Diama 14	0.0563055	0.00159636	0.623525	0.0182114	0.0802368	0.000531087	0.226622	464.86	30.5525	492.055	11.3947	497.536	3.18068	0.98	0.128473	2.40869e-05	0.511467	3.06277e-05	0.51105	3.05496e-05
Diama 15	0.0570677	0.00173017	0.630239	0.0199965	0.0799392	0.000545591	0.215109	494.485	63.8825	496.245	12.4593	495.76	3.26775	0.99	0.128689	2.34118e-05	0.511427	2.67948e-05	0.511009	2.67189e-05
Diama 16	0.0569798	0.00154356	0.629232	0.0173026	0.0799633	0.000435298	0.197968	500.04	59.2525	495.617	10.7887	495.904	2.61211	0.99	0.12335	3.35555e-05	0.511416	2.33988e-05	0.511016	2.329e-05
Diama 17	0.0569388	0.000785149	0.628834	0.00895697	0.0799704	0.00044174	0.387804	500.04	31.48	495.369	5.59375	495.946	2.65034	0.99	0.126705	1.89607e-05	0.51143	2.22853e-05	0.511019	2.22239e-05
Diama 18	0.0570642	0.000746707	0.627425	0.00833094	0.0796405	0.000444583	0.420423	494.485	29.625	494.491	5.20871	493.976	2.66792	0.99	0.126317	2.09662e-05	0.511406	2.4042e-05	0.510997	2.3974e-05
Diama 19	0.0558654	0.00103155	0.615781	0.0115068	0.0798202	0.000459001	0.307732	455.6	40.7375	487.199	7.23864	495.05	2.7532	0.98	0.123073	4.81572e-05	0.511411	2.41111e-05	0.511011	2.3955e-05
Diama 20	0.0565274	0.000815681	0.620439	0.0090127	0.0795075	0.000433986	0.375761	472.265	31.4775	490.123	5.65727	493.182	2.60525	0.99	0.1231	1.83911e-05	0.511405	2.23051e-05	0.511006	2.22454e-05
Diama 21	0.0567727	0.00074283	0.623138	0.00826592	0.0794709	0.000430383	0.408263	483.375	34.255	491.812	5.1817	492.964	2.58392	0.99	0.121907	4.33783e-05	0.511406	2.27137e-05	0.511011	2.2573e-05
Diama 22	0.0571616	0.000562474	0.630609	0.0062359	0.0798862	0.00042391	0.536615	498.19	22.22	496.475	3.89775	495.443	2.54465	0.99	0.12728	2.78214e-05	0.511419	2.33322e-05	0.511006	2.3242e-05
Diama 23	0.0567155	0.000590549	0.626499	0.00661581	0.0799623	0.000425597	0.504023	479.67	22.22	493.912	4.14372	495.897	2.55451	0.99	0.1272	1.822e-05	0.511418	2.54458e-05	0.511006	2.53868e-05
Diama 24	0.0567267	0.00053934	0.626116	0.00599837	0.0798973	0.000432983	0.565666	479.67	20.3675	493.673	3.76053	495.51	2.59849	0.99	0.128951	2.70628e-05	0.511432	2.8921e-05	0.511013	2.88333e-05
Diama 25	0.0569326	0.000561854	0.628675	0.0062475	0.0799028	0.000423945	0.533909	487.08	15.74	495.27	3.90948	495.542	2.54482	0.99	0.127286	2.201e-05	0.511432	2.4103e-05	0.511019	2.40317e-05
Diama 26	0.0564512	0.00081728	0.621588	0.00901091	0.0796642	0.000425629	0.368555	477.82	31.4775	490.842	5.65218	494.118	2.5553	0.99	0.125976	1.35067e-05	0.511412	2.14529e-05	0.511004	2.14091e-05

## Sheet: Namaqualand
Sample	Isotope Ratio							Age (Ma)							Nd isotope
	207Pb/206Pb	1σ (abs)	207Pb/235U	1σ (abs)	206Pb/238U	1σ (abs)	Rho	207Pb/206Pb	1σ (abs)	207Pb/235Ua	1σ (abs)	206Pb/238U	1σ (abs)	Concordance	147Sm/144Nd	2σ (abs)	143Nd/144Nd	2σ (abs)	143Nd/144Nd (Initial) @ 1062Ma	2σ (abs)
			Ratio		Ratio					Ratio		Ratio
Session 1
Namaqualand 01	0.0747429	0.00155899	1.81934	0.0375416	0.176267	0.0011294	0.310512	1061.12	41.2025	1052.45	13.5395	1046.55	6.21531	0.99	0.100349	5.22727e-05	0.511868	4.42288e-05	0.511169	4.38645e-05
Namaqualand 02	0.07599	0.00166588	1.86706	0.0406362	0.177864	0.0010949	0.282835	1094.44	44.445	1069.49	14.4099	1055.29	6.01942	0.98	0.0996861	5.8257e-05	0.511891	4.56255e-05	0.511196	4.52195e-05
Namaqualand 03	0.0755923	0.00160259	1.82173	0.038592	0.174427	0.0010801	0.292307	1084.26	42.5925	1053.31	13.9055	1036.45	5.95502	0.98	0.0998797	5.02193e-05	0.511898	4.33145e-05	0.511202	4.29645e-05
Namaqualand 04	0.0755476	0.00169577	1.84975	0.0416448	0.177188	0.00110934	0.278088	1083.34	44.445	1063.34	14.8559	1051.6	6.10135	0.98	0.0990955	7.50676e-05	0.511899	4.19429e-05	0.511209	4.14197e-05
Namaqualand 05	0.0744709	0.00140045	1.83566	0.0343274	0.178436	0.00109906	0.329374	1053.71	37.5	1058.31	12.3129	1058.42	6.03929	0.99	0.0996035	6.01382e-05	0.511902	4.64948e-05	0.511208	4.60756e-05
Namaqualand 06	0.0741772	0.00142647	1.80299	0.0351429	0.175854	0.00110541	0.322499	1055.56	38.89	1046.54	12.7504	1044.28	6.08638	0.99	0.099497	5.53583e-05	0.511904	4.75663e-05	0.511211	4.71804e-05
Namaqualand 07	0.0733909	0.00152195	1.77717	0.0364992	0.175266	0.00108066	0.300218	1033.34	41.5125	1037.15	13.3634	1041.06	5.95409	0.99	0.0993545	4.78897e-05	0.511908	4.26997e-05	0.511215	4.23659e-05
Namaqualand 08	0.0743898	0.00149175	1.80225	0.0363331	0.175314	0.00108933	0.308215	1053.71	39.3525	1046.27	13.1844	1041.33	6.00121	0.99	0.0996972	5.82567e-05	0.511912	4.64322e-05	0.511218	4.60262e-05
Namaqualand 09	0.074195	0.00184345	1.81386	0.0464556	0.176802	0.00112708	0.248904	1055.56	50	1050.47	16.7788	1049.48	6.2	0.99	0.0999014	5.39636e-05	0.511913	3.99713e-05	0.511217	3.95952e-05
Namaqualand 10	0.0733308	0.00152907	1.78719	0.0371433	0.176389	0.00108865	0.296966	1033.34	37.965	1040.8	13.5499	1047.22	5.99236	0.99	0.0998033	5.56382e-05	0.511916	4.68414e-05	0.511221	4.64536e-05
Namaqualand 11	0.0754677	0.00240111	1.87274	0.0591275	0.179603	0.00112608	0.198584	1081.17	63.43	1071.5	20.9115	1064.81	6.18072	0.99	0.099692	4.56687e-05	0.511921	4.39584e-05	0.511226	4.36401e-05
Session 2
Namaqualand 12	0.0752267	0.000810549	1.83504	0.0197028	0.176477	0.00093131	0.4915	1075.93	21.14	1058.09	7.09324	1047.7	5.13431	0.99	0.0995692	3.11664e-05	0.511912	2.89531e-05	0.511218	2.87359e-05
Namaqualand 13	0.0743739	0.000854075	1.82009	0.0208214	0.177045	0.000914053	0.451304	1051.55	24.0775	1052.72	7.53092	1050.81	5.03812	0.99	0.0995534	3.19156e-05	0.511876	3.20727e-05	0.511182	3.18503e-05
Namaqualand 14	0.0743527	0.000821673	1.81988	0.0202725	0.177061	0.000913607	0.463204	1050.93	22.6875	1052.64	7.33475	1050.9	5.03564	0.99	0.0995142	3.04252e-05	0.511917	3.00625e-05	0.511224	2.98505e-05
Namaqualand 15	0.0742953	0.000770971	1.82381	0.0188742	0.177613	0.000929579	0.505735	1050.01	21.1425	1054.06	6.8245	1053.92	5.12037	0.99	0.0994861	3.1437e-05	0.511899	3.03721e-05	0.511206	3.0153e-05
Namaqualand 16	0.0762623	0.000894426	1.85791	0.0215149	0.176279	0.00091739	0.449404	1101.85	22.685	1066.24	7.67833	1046.62	5.05928	0.98	0.0994923	3.08335e-05	0.511878	2.93414e-05	0.511185	2.91265e-05
Namaqualand 17	0.0747219	0.000754372	1.8235	0.0181903	0.176597	0.000912218	0.517824	1061.12	20.365	1053.95	6.58072	1048.36	5.02988	0.99	0.0992771	3.66018e-05	0.511889	3.19441e-05	0.511197	3.1689e-05
Namaqualand 18	0.0746026	0.000750351	1.82058	0.018159	0.176582	0.000901111	0.511621	1057.41	20.3675	1052.89	6.57618	1048.27	4.96947	0.99	0.0993393	3.50789e-05	0.511894	3.75801e-05	0.511202	3.73356e-05
Namaqualand 19	0.0746563	0.000742862	1.83148	0.0181103	0.177511	0.000903306	0.51462	1061.12	20.3675	1056.81	6.53409	1053.36	4.97786	0.99	0.0994076	3.29232e-05	0.51188	3.30518e-05	0.511187	3.28223e-05
Namaqualand 20	0.0738164	0.000735069	1.79127	0.0176139	0.175612	0.000897766	0.519895	1036.73	20.3725	1042.29	6.44649	1042.96	4.95497	0.99	0.0994106	3.11645e-05	0.511867	3.02956e-05	0.511174	3.00784e-05
Namaqualand 21	0.0745149	0.000780701	1.82207	0.0191336	0.176925	0.000899258	0.48402	1055.25	20.37	1053.43	6.92147	1050.15	4.95808	0.99	0.0994452	2.93897e-05	0.511895	2.84548e-05	0.511202	2.825e-05
Namaqualand 22	0.0744828	0.000789929	1.82014	0.0193749	0.176821	0.000912737	0.484929	1054.63	21.45	1052.74	7.0125	1049.58	5.03183	0.99	0.099554	2.84059e-05	0.511885	2.99601e-05	0.511191	2.97621e-05
Namaqualand 23	0.0756341	0.000805565	1.82854	0.0195208	0.17496	0.000921482	0.49335	1087.04	20.83	1055.75	7.04421	1039.38	5.08677	0.98	0.0994537	3.30042e-05	0.511902	3.40167e-05	0.511209	3.37867e-05
Namaqualand 24	0.0752841	0.000803951	1.82713	0.0196527	0.175605	0.000904514	0.478878	1075.93	22.22	1055.25	7.09479	1042.92	4.99176	0.98	0.099611	3.38532e-05	0.511926	3.25728e-05	0.511231	3.23368e-05
Namaqualand 25	0.0755022	0.000852003	1.833	0.0206433	0.17568	0.000891514	0.450598	1083.34	23.3025	1057.36	7.43366	1043.33	4.92065	0.98	0.0993917	3.544e-05	0.511901	3.49221e-05	0.511208	3.46751e-05
Namaqualand 26	0.0749377	0.000845742	1.82547	0.0206536	0.176297	0.000929414	0.465955	1133.34	27.93	1054.65	7.45682	1046.71	5.1247	0.99	0.0995494	3.08066e-05	0.511906	3.25075e-05	0.511213	3.22928e-05

## Sheet: PlotDat2
Source sheet	RW-1	0.3	0.512424	1	0.51238	4.34007e-05
Plot name	Average2	23.7	0.512424	2	0.512436	4.54043e-05
Plot Type	15			3	0.512425	4.23489e-05
1st free col	8			4	0.512416	4.72769e-05
Sigma Level	2			5	0.512395	4.34399e-05
Absolute Errs	TRUE			6	0.512402	4.57456e-05
Symbol Type	1			7	0.512394	4.56284e-05
Inverse Plot	FALSE			8	0.512423	4.05627e-05
Color Plot	TRUE			9	0.512436	4.07631e-05
3D plot	FALSE			10	0.512415	4.3569e-05
Linear	FALSE			11	0.512435	4.53764e-05
Data Range	R4:S26			12	0.512441	4.64718e-05
Filled Symbols	FALSE			13	0.512398	4.01938e-05
ConcAge	FALSE			14	0.512418	4.74033e-05
ConcSwap	FALSE			15	0.512436	3.28931e-05
1st Symbol-row	1			16	0.512468	2.95339e-05
				17	0.512412	3.22743e-05
				18	0.512425	3.18046e-05
				19	0.512411	3.40813e-05
				20	0.512409	3.10043e-05
				21	0.512431	3.35931e-05
				22	0.512437	3.25898e-05
				23	0.512443	2.82728e-05
				IsoLine	IsoLine	IsoLine	IsoLine

## Sheet: RW-1
Sample	Isotope Ratio							Age (Ma)							Nd isotope
	207Pb/206Pb	1σ (abs)	207Pb/235U	1σ (abs)	206Pb/238U	1σ (abs)	Rho	207Pb/206Pb	1σ (abs)	207Pb/235Ua	1σ (abs)	206Pb/238U	1σ (abs)	Concordance	147Sm/144Nd	2σ (abs)	143Nd/144Nd	2σ (abs)	143Nd/144Nd (Initial) @ 907Ma	2σ (abs)
			Ratio		Ratio					Ratio		Ratio
RW-1 01	0.071082	0.000674274	1.47422	0.0140415	0.150106	0.000784859	0.548961	961.11	24.23	919.859	5.76244	901.556	4.39919	0.979902	0.175506	0.000134294	0.51238	4.34007e-05	0.511336	4.26017e-05
RW-1 02	0.069549	0.000627272	1.45111	0.0134681	0.150987	0.000797882	0.56937	916.665	50.925	910.334	5.5792	906.495	4.46875	0.995773	0.178385	5.3997e-05	0.512436	4.54043e-05	0.511374	4.5083e-05
RW-1 03	0.0693218	0.00142226	1.46523	0.0311503	0.15292	0.000823281	0.253237	909.26	42.5925	916.165	12.8302	917.312	4.60328	0.998749	0.178815	6.16301e-05	0.512425	4.23489e-05	0.511361	4.19822e-05
RW-1 04	0.0686319	0.000896964	1.43602	0.0190789	0.151407	0.000794598	0.395011	887.035	26.6975	904.062	7.95249	908.844	4.44874	0.994725	0.177002	7.02186e-05	0.512416	4.72769e-05	0.511363	4.68592e-05
RW-1 05	0.0694012	0.000749052	1.46496	0.01576	0.152756	0.000781255	0.475406	910.8	22.22	916.054	6.49196	916.393	4.36891	0.999631	0.172711	9.49443e-05	0.512395	4.34399e-05	0.511368	4.28751e-05
RW-1 06	0.0691824	0.000974666	1.44694	0.0204555	0.151346	0.000791011	0.369702	905.555	28.5475	908.604	8.48822	908.505	4.42889	0.999891	0.177815	5.44209e-05	0.512402	4.57456e-05	0.511344	4.54219e-05
RW-1 07	0.0690611	0.0013991	1.44878	0.0296652	0.151798	0.000810677	0.260817	901.85	42.595	909.365	12.3007	911.034	4.53722	0.998167	0.178689	4.66383e-05	0.512394	4.56284e-05	0.511331	4.5351e-05
RW-1 08	0.0703632	0.000746062	1.46969	0.0162414	0.151148	0.000879241	0.526392	938.885	22.2225	918	6.67744	907.394	4.92374	0.988379	0.177667	9.52088e-05	0.512423	4.05627e-05	0.511366	3.99963e-05
RW-1 09	0.069818	0.000686517	1.45007	0.0144159	0.150328	0.000778075	0.52063	924.07	20.37	909.903	5.97439	902.801	4.36032	0.992164	0.179216	4.99656e-05	0.512436	4.07631e-05	0.51137	4.04658e-05
RW-1 10	0.069212	0.000811067	1.44136	0.0168457	0.150755	0.000784452	0.445221	905.555	24.845	906.284	7.00629	905.197	4.39442	0.9988	0.175025	8.5435e-05	0.512415	4.3569e-05	0.511374	4.30607e-05
RW-1 11	0.0697655	0.000792252	1.45491	0.0171313	0.151028	0.000997504	0.560923	920.37	24.07	911.905	7.08571	906.724	5.58659	0.994303	0.177999	5.9094e-05	0.512435	4.53764e-05	0.511376	4.50249e-05
RW-1 12	0.069503	0.000953221	1.43974	0.0198215	0.149984	0.000936065	0.453323	922.22	27.7775	905.61	8.24944	900.871	5.24726	0.994754	0.178366	4.49731e-05	0.512441	4.64718e-05	0.51138	4.62042e-05
RW-1 13	0.0698107	0.000723145	1.45852	0.0152314	0.151233	0.000787383	0.498551	924.07	21.14	913.397	6.29067	907.874	4.40901	0.993934	0.178571	5.949e-05	0.512398	4.01938e-05	0.511335	3.98398e-05
RW-1 14	0.0704352	0.000732875	1.46551	0.0155403	0.150583	0.0007933	0.49681	942.59	20.8325	916.28	6.40003	904.231	4.44465	0.986763	0.178714	5.03493e-05	0.512418	4.74033e-05	0.511355	4.71037e-05
RW-1 15	0.0689241	0.00143448	1.44	0.0305634	0.151224	0.000806364	0.25123	898.15	42.5925	905.718	12.7336	907.818	4.54187	0.99	0.185916	3.18632e-05	0.512436	3.28931e-05	0.51133	3.27036e-05
RW-1 16	0.068483	0.0011775	1.43204	0.025226	0.151341	0.000816395	0.306232	883.33	31.33	902.402	10.5498	908.475	4.59729	0.99	0.185763	3.43656e-05	0.512468	2.95339e-05	0.511363	2.93295e-05
RW-1 17	0.067503	0.00105595	1.43255	0.0229238	0.153591	0.000819531	0.333444	853.7	33.3325	902.614	9.58841	921.06	4.60658	0.97	0.185746	3.07598e-05	0.512412	3.22743e-05	0.511307	3.20913e-05
RW-1 18	0.0668782	0.00104943	1.40672	0.022319	0.152238	0.000792782	0.328218	835.18	-166.825	891.774	9.4358	913.496	4.46272	0.97	0.185815	3.76163e-05	0.512425	3.18046e-05	0.511319	3.15808e-05
RW-1 19	0.0672769	0.00114546	1.41721	0.0245933	0.152456	0.000798901	0.30197	855.55	35.955	896.19	10.3487	914.719	4.49597	0.97	0.185842	4.46644e-05	0.512411	3.40813e-05	0.511305	3.38155e-05
RW-1 20	0.0685232	0.00105711	1.43528	0.022264	0.151591	0.000790824	0.336312	883.33	31.4825	903.755	9.30321	909.874	4.45408	0.99	0.185638	3.40219e-05	0.512409	3.10043e-05	0.511304	3.08019e-05
RW-1 21	0.0684202	0.00116694	1.42809	0.024375	0.151057	0.000784957	0.30445	881.17	30.5575	900.751	10.2116	906.885	4.42329	0.99	0.185843	2.82102e-05	0.512431	3.35931e-05	0.511325	3.34253e-05
RW-1 22	0.0672742	0.00120169	1.40337	0.0249007	0.150973	0.000783784	0.292589	855.55	37.035	890.362	10.5375	906.417	4.41705	0.98	0.185728	3.63901e-05	0.512437	3.25898e-05	0.511333	3.23733e-05
RW-1 23	0.068337	0.00133762	1.42862	0.0277229	0.151298	0.000794196	0.270502	879.63	40.7425	900.974	11.6069	908.238	4.47387	0.99	0.185702	3.01933e-05	0.512443	2.82728e-05	0.511338	2.80931e-05

## Sheet: OLT-1
Sample	Isotope Ratio								207Pb Corr. Age (Ma)		Nd isotope
	238U/206Pb	1σ (abs)	207Pb/206Pb	1σ (abs)	207Pb/235U	1σ (abs)	206Pb/238U	1σ (abs)	206Pb/238U	1σ (abs)	147Sm/144Nd	2σ (abs)	143Nd/144Nd	2σ (abs)	143Nd/144Nd (Initial) @ 1015Ma	2σ (abs)
	Ratio				Ratio		Ratio		Ratio
OLT 01	5.8202	0.0585717	0.0831646	0.000856504	1.97042	0.0205261	0.171815	0.00172907	1015.6	9.93791	0.125056	5.16448e-05	0.51222	2.19997e-05	0.511471	4.21528e-05
OLT 02	5.75765	0.0577873	0.0830046	0.00084713	1.988	0.0204051	0.173682	0.00174318	1016.69	9.91468	0.124778	2.82954e-05	0.5122	2.41074e-05	0.511491	4.2104e-05
OLT 03	5.76593	0.0581178	0.0834461	0.000849988	1.99575	0.0206126	0.173433	0.00174812	1016.13	9.94318	0.124756	2.65085e-05	0.512203	2.1487e-05	0.511324	2.87983e-05
OLT 04	5.7741	0.0582089	0.0837034	0.000854131	1.9989	0.0204426	0.173187	0.0017459	1015.32	9.95615	0.125162	2.47105e-05	0.512221	2.40759e-05	0.511717	3.04801e-05
OLT 05	5.81349	0.058564	0.0863833	0.000881895	2.04886	0.0210177	0.172014	0.00173283	1012.99	9.92416	0.125294	2.29964e-05	0.512188	2.11895e-05	0.511298	3.41695e-05
OLT 06	5.80546	0.0589412	0.0852161	0.000963225	2.02372	0.0229543	0.172252	0.00174882	1013.72	10.0217	0.125186	2.44504e-05	0.5122	2.25833e-05	0.511567	3.74453e-05
OLT 07	5.81421	0.0590323	0.0840148	0.000852523	1.99227	0.0205501	0.171992	0.00174626	1015.25	9.91642	0.125078	2.95153e-05	0.512205	2.0826e-05	0.511651	4.32653e-05
OLT 08	5.78697	0.0586604	0.0849798	0.000865198	2.02471	0.0209818	0.172802	0.00175163	1014.97	9.99706	0.125134	2.57087e-05	0.512211	2.14815e-05	0.511614	3.86169e-05
OLT 09	5.78657	0.058464	0.0840531	0.000858839	2.00271	0.0205534	0.172814	0.00174601	1013.92	9.98345	0.125277	2.54677e-05	0.512196	2.10747e-05	0.511243	4.61622e-05
OLT 10	5.80279	0.059101	0.0838327	0.000852915	1.99197	0.0204681	0.172331	0.00175517	1015.09	9.9624	0.125219	2.6277e-05	0.512227	2.32599e-05	0.510929	3.85315e-05
OLT 11	5.7686	0.0590723	0.0910072	0.000935528	2.17569	0.0234503	0.173352	0.00177518	1015.91	10.0171	0.125137	2.50566e-05	0.51222	1.8702e-05	0.511039	7.92341e-05
OLT 12	5.7614	0.0581393	0.0843559	0.000855937	2.01898	0.0207398	0.173569	0.00175152	1007.54	10.0267	0.124981	2.47413e-05	0.512202	2.13102e-05	0.510854	3.7972e-05
OLT 13	5.8184	0.0591277	0.0875561	0.000891678	2.07505	0.0215157	0.171869	0.00174656	1014.59	9.93536	0.124588	2.34109e-05	0.512194	2.31354e-05	0.511429	2.77587e-05
OLT 14	5.78568	0.0584767	0.0837297	0.000859305	1.99556	0.0206486	0.17284	0.00174692	1015.62	9.97206	0.124173	2.48722e-05	0.512217	1.92221e-05	0.510852	3.31548e-05
OLT 15	5.7852	0.0589136	0.08415	0.000857673	2.00582	0.0208761	0.172855	0.00176027	1015.2	10.0422	0.124626	2.67717e-05	0.512186	2.36716e-05	0.510902	3.84163e-05
OLT 16	5.7866	0.0589079	0.0829728	0.000852459	1.97732	0.0207653	0.172813	0.00175925	1016.36	10.049	0.123861	4.5717e-05	0.512196	2.17116e-05	0.510929	3.00059e-05
OLT 17	5.81944	0.0595501	0.0845367	0.000859861	2.0033	0.0210504	0.171838	0.00175841	1014.45	10.0073	0.124953	2.49148e-05	0.512188	2.18107e-05	0.511494	3.35961e-05
OLT 18	5.76846	0.0581776	0.0827561	0.000850008	1.97828	0.0203213	0.173356	0.00174838	1016.17	9.95959	0.12484	4.70094e-05	0.51223	2.11829e-05	0.51113	3.28905e-05
OLT 19	5.75095	0.0577329	0.0835191	0.000856892	2.00265	0.0205031	0.173884	0.0017456	1015.91	9.96098	0.125136	2.63346e-05	0.512219	1.98183e-05	0.511014	3.66776e-05
OLT 20	5.82475	0.05929	0.0827614	0.000849512	1.95936	0.0202988	0.171681	0.00174754	1016.86	10.021	0.125146	2.75049e-05	0.512217	2.21126e-05	0.510887	3.37478e-05

## Sheet: Ontario
Sample	Isotope Ratio								207Pb Corr. Age (Ma)		Nd isotope
	238U/206Pb	1σ (abs)	207Pb/206Pb	1σ (abs)	207Pb/235U	1σ (abs)	206Pb/238U	1σ (abs)	206Pb/238U	1σ (abs)	147Sm/144Nd	2σ (abs)	143Nd/144Nd	2σ (abs)	143Nd/144Nd (Initial) @1053Ma	2σ (abs)
	Ratio				Ratio		Ratio		Ratio
Ontraio 01	5.5347	0.0558482	0.0946114	0.00104056	2.35643	0.0254182	0.180678	0.00182314	1046.62	10.3163	0.19435	3.25815e-05	0.512832	2.5788e-05	0.511489	2.55629e-05
Ontraio 02	5.58605	0.0563441	0.0884397	0.000894864	2.18305	0.022218	0.179017	0.00180567	1044.88	10.2279	0.19393	4.18221e-05	0.512793	2.73089e-05	0.511452	2.70199e-05
Ontraio 03	5.57078	0.0562811	0.0918794	0.000933469	2.27397	0.023042	0.179508	0.00181355	1043.43	10.2453	0.193827	3.94403e-05	0.512808	2.55325e-05	0.511469	2.526e-05
Ontraio 04	5.55288	0.0560823	0.0911269	0.000924755	2.2627	0.022988	0.180087	0.00181882	1047.6	10.2984	0.194927	4.38517e-05	0.512819	3.02211e-05	0.511472	2.9918e-05
Ontraio 05	5.5387	0.0557309	0.0914333	0.000925005	2.27623	0.0230915	0.180548	0.00181669	1049.81	10.2982	0.194011	3.92454e-05	0.512811	2.79771e-05	0.51147	2.77059e-05
Ontraio 06	5.60439	0.056509	0.0905444	0.00091927	2.22761	0.0226653	0.178432	0.00179912	1039.02	10.16	0.193211	3.84888e-05	0.512823	2.45384e-05	0.511488	2.42724e-05
Ontraio 07	5.55834	0.0557816	0.0910384	0.000920764	2.25825	0.022896	0.17991	0.00180551	1046.71	10.2199	0.192997	3.85519e-05	0.512837	2.80007e-05	0.511504	2.77343e-05
Ontraio 08	5.59689	0.0562284	0.0909041	0.000919359	2.23932	0.0227608	0.178671	0.00179499	1039.93	10.1358	0.194095	5.93824e-05	0.512826	2.83912e-05	0.511484	2.79808e-05
Ontraio 09	5.61041	0.0563865	0.09084	0.000921712	2.23232	0.0227819	0.17824	0.00179138	1037.59	10.1115	0.194326	3.62317e-05	0.512812	3.03836e-05	0.511469	3.01332e-05
Ontraio 10	5.5393	0.056042	0.0917918	0.00093445	2.28458	0.0234539	0.180528	0.00182644	1049.26	10.3483	0.194336	4.14228e-05	0.512815	2.76672e-05	0.511472	2.7381e-05
Ontraio 11	5.59193	0.0567046	0.0922314	0.000935954	2.27381	0.0232187	0.178829	0.00181341	1039.2	10.2267	0.19431	4.3383e-05	0.512783	2.9408e-05	0.51144	2.91082e-05
Ontraio 12	5.54897	0.0559662	0.0938915	0.000958502	2.33308	0.02429	0.180214	0.00181762	1044.91	10.2665	0.193922	4.0929e-05	0.512788	3.00913e-05	0.511448	2.98085e-05
Ontraio 13	5.6109	0.0568989	0.0906178	0.000922616	2.22653	0.0228732	0.178224	0.00180733	1037.77	10.2031	0.194154	3.88111e-05	0.512825	2.66619e-05	0.511483	2.63937e-05
Ontraio 14	5.55269	0.0558795	0.0904353	0.000919969	2.24548	0.0230488	0.180093	0.00181236	1048.48	10.2706	0.194245	3.78839e-05	0.512822	2.83381e-05	0.51148	2.80763e-05
Ontraio 15	5.5476	0.0561482	0.0917815	0.000929713	2.281	0.0234679	0.180258	0.00182442	1047.75	10.3275	0.194305	3.23624e-05	0.512839	2.49694e-05	0.511496	2.47458e-05
Ontraio 16	5.57524	0.0578958	0.0909639	0.000926766	2.24883	0.0231482	0.179365	0.0018626	1043.75	10.5251	0.193385	4.15593e-05	0.512797	2.60097e-05	0.511461	2.57226e-05
Ontraio 17	5.59782	0.0575081	0.092692	0.000950798	2.28321	0.0243318	0.178641	0.00183523	1037.58	10.3415	0.193596	4.71113e-05	0.512806	2.95032e-05	0.511469	2.91776e-05
Ontraio 18	5.55257	0.0565545	0.0929618	0.000972907	2.30749	0.0237201	0.180097	0.00183433	1045.4	10.3688	0.194059	4.00509e-05	0.51282	2.85074e-05	0.511479	2.82306e-05
Ontraio 19	5.54749	0.0566878	0.0933004	0.000944558	2.31881	0.0239651	0.180262	0.00184203	1045.91	10.4084	0.1936	4.11387e-05	0.512814	2.62693e-05	0.511477	2.5985e-05
Ontraio 20	5.53635	0.0567186	0.0914099	0.000927468	2.27664	0.0238905	0.180625	0.00185046	1050.26	10.4886	0.193975	4.70148e-05	0.512794	2.65211e-05	0.511453	2.61962e-05

## Sheet: AFK
Sample	Isotope Ratio								207Pb Corr. Age (Ma)		Nd isotope
	238U/206Pb	1σ (abs)	207Pb/206Pb	1σ (abs)	207Pb/235U	1σ (abs)	206Pb/238U	1σ (abs)	206Pb/238U	1σ (abs)	147Sm/144Nd	2σ (abs)	143Nd/144Nd	2σ (abs)	143Nd/144Nd (Initial) @379Ma	2σ (abs)
	Ratio				Ratio		Ratio		Ratio
AFK 01	14.6	0.157621	0.14017	0.00209005	1.32448	0.0209946	0.0684931	0.000739449	382.93	5.1783	0.0794566	4.64461e-05	0.512591	3.60022e-05	0.512394	3.58869e-05
AFK 02	14.6519	0.156557	0.136345	0.00201571	1.2833	0.0195399	0.0682506	0.000729264	383.587	5.08858	0.0762104	4.59529e-05	0.512604	3.69158e-05	0.512415	3.68017e-05
AFK 03	14.4933	0.152954	0.139416	0.00194223	1.326	0.0183501	0.0689972	0.000728157	386.093	5.23442	0.0791973	0.000103356	0.512589	3.54517e-05	0.512392	3.51952e-05
AFK 04	14.6633	0.156014	0.138429	0.0019584	1.30132	0.0183434	0.0681977	0.000725608	382.213	5.04565	0.0789616	4.2953e-05	0.512599	4.04125e-05	0.512403	4.03059e-05
AFK 05	15.2877	0.159785	0.116093	0.00166475	1.04723	0.0152509	0.0654119	0.000683673	378.008	4.37715	0.0806246	7.04155e-05	0.512609	3.94322e-05	0.512409	3.92574e-05
AFK 06	15.1927	0.158165	0.115534	0.0016249	1.04849	0.0147644	0.0658212	0.000685241	380.611	4.45286	0.0794529	4.56242e-05	0.5126	3.53964e-05	0.512403	3.52832e-05
AFK 07	15.2431	0.158866	0.116004	0.0016866	1.04929	0.01536	0.0656033	0.000683729	379.139	4.41167	0.0801214	5.60738e-05	0.512619	3.44967e-05	0.51242	3.43576e-05
AFK 08	15.3112	0.161983	0.112687	0.00154016	1.01475	0.0140894	0.0653115	0.000690953	379.133	4.40246	0.078446	3.93643e-05	0.512597	3.83414e-05	0.512402	3.82437e-05
AFK 09	15.2324	0.162241	0.116863	0.00159607	1.05788	0.0148961	0.0656494	0.000699236	378.971	4.48461	0.0791313	3.93804e-05	0.512559	3.75261e-05	0.512363	3.74283e-05
AFK 10	15.2412	0.16174	0.115196	0.00153043	1.04245	0.0146514	0.0656118	0.000696276	379.591	4.4656	0.0786956	4.09954e-05	0.512604	3.45334e-05	0.512409	3.44317e-05
AFK 11	15.2406	0.164496	0.115353	0.00176318	1.04329	0.0162728	0.0656143	0.000708195	379.527	4.54645	0.079581	6.30122e-05	0.512637	3.67499e-05	0.512439	3.65935e-05
AFK 12	15.5043	0.167088	0.104049	0.00148141	0.925172	0.0135412	0.0644983	0.000695091	378.741	4.34154	0.0791561	5.13711e-05	0.512557	3.69284e-05	0.512361	3.68009e-05
AFK 13	15.6739	0.162247	0.0969842	0.0014202	0.852968	0.01254	0.0638004	0.000660425	378.15	4.09604	0.0793995	8.03481e-05	0.512558	3.78037e-05	0.512361	3.76043e-05
AFK 14	15.4437	0.163634	0.100542	0.00140173	0.89745	0.0127579	0.0647512	0.00068607	381.928	4.33899	0.0774668	8.13475e-05	0.512561	3.2587e-05	0.512369	3.23852e-05
AFK 15	15.4929	0.165715	0.102987	0.00141166	0.916152	0.01263	0.0645458	0.000690393	379.537	4.32247	0.080377	6.09154e-05	0.51262	3.67327e-05	0.51242	3.65815e-05
AFK 16	15.508	0.16689	0.102867	0.00144066	0.914422	0.0131819	0.0644827	0.000693933	379.232	4.33575	0.0799075	8.14779e-05	0.512571	3.72197e-05	0.512373	3.70175e-05
AFK 17	15.5293	0.165749	0.0965501	0.00140768	0.857226	0.0128685	0.0643945	0.000687302	381.82	4.31666	0.0807578	5.66022e-05	0.512592	3.47427e-05	0.512392	3.46022e-05
AFK 18	15.472	0.164008	0.0989686	0.00132468	0.881939	0.0121019	0.064633	0.000685133	382.018	4.31909	0.0789084	7.22954e-05	0.512583	3.96107e-05	0.512387	3.94313e-05
AFK 19	15.5398	0.169426	0.0966887	0.00135242	0.857843	0.0124922	0.064351	0.000701601	381.499	4.38356	0.07493	0.000101102	0.512594	3.66201e-05	0.512408	3.63692e-05
AFK 20	15.5601	0.171022	0.0968967	0.00146632	0.858766	0.0136708	0.0642671	0.000706365	380.909	4.40659	0.0773436	9.847e-05	0.512593	3.82533e-05	0.512401	3.80089e-05
AFK 21	15.6043	0.165824	0.094476	0.00138294	0.835099	0.0128294	0.0640847	0.000681017	381.029	4.2515	0.076126	4.63215e-05	0.512575	4.32677e-05	0.512386	4.31527e-05
AFK 22	15.5596	0.168575	0.0941483	0.00139042	0.834165	0.012586	0.064269	0.000696301	382.265	4.35985	0.0731429	0.000111557	0.512563	3.81006e-05	0.512381	3.78238e-05
AFK 23	15.553	0.166367	0.0979181	0.00138857	0.867942	0.0125253	0.0642961	0.00068776	380.578	4.29828	0.0715342	5.76634e-05	0.512598	3.39393e-05	0.51242	3.37962e-05

## Sheet: 10AFK-2
Sample	Isotope Ratio								207Pb Corr. Age (Ma)		Nd isotope
	238U/206Pb	1σ (abs)	207Pb/206Pb	1σ (abs)	207Pb/235U	1σ (abs)	206Pb/238U	1σ (abs)	206Pb/238U	1σ (abs)	147Sm/144Nd	2σ (abs)	143Nd/144Nd	2σ (abs	143Nd/144Nd (Initial) @379Ma	2σ (abs)
	Ratio				Ratio		Ratio		Ratio
10AFK-2 01	16.0838	0.171636	0.0827327	0.00111233	0.710023	0.00970243	0.0621743	0.000663484	379.72	4.1027	0.0709636	4.80081e-05	0.512625	3.17788e-05	0.512449	3.16596e-05
10AFK-2 02	15.9923	0.168762	0.0780112	0.0010686	0.672879	0.00905422	0.0625301	0.00065986	377.253	3.97062	0.0632001	3.94774e-05	0.512591	3.27049e-05	0.512434	3.26069e-05
10AFK-2 03	15.8193	0.167074	0.0839061	0.00114022	0.731285	0.00984997	0.0632139	0.000667628	379.691	4.04827	0.0719399	4.96967e-05	0.512601	3.3036e-05	0.512422	3.29126e-05
10AFK-2 04	16.2031	0.174402	0.0728587	0.000974272	0.619929	0.00836154	0.0617164	0.000664283	379.886	4.10151	0.0708375	7.75712e-05	0.512628	2.93126e-05	0.512453	2.91201e-05
10AFK-2 05	16.0428	0.169929	0.0861158	0.00120549	0.739963	0.0103247	0.0623332	0.000660249	377.115	4.05927	0.0689201	0.000166088	0.512583	2.68117e-05	0.512412	2.63995e-05
10AFK-2 06	16.0433	0.173334	0.0727353	0.000972727	0.625076	0.00860104	0.0623311	0.000673432	378.538	4.04977	0.0738129	5.33024e-05	0.512591	3.10414e-05	0.512408	3.09091e-05
10AFK-2 07	16.209	0.178829	0.0757162	0.00102697	0.643943	0.00892599	0.0616942	0.000680655	378.05	4.15401	0.0663093	2.62641e-05	0.512616	3.14631e-05	0.512452	3.13979e-05
10AFK-2 08	15.988	0.174953	0.0743317	0.00103366	0.640986	0.00914432	0.0625467	0.000684433	379.602	4.13563	0.0645509	2.30402e-05	0.512586	2.9189e-05	0.512426	2.91318e-05
10AFK-2 09	16.2323	0.191095	0.0743627	0.0010675	0.631573	0.00960474	0.0616056	0.000725253	378.341	4.43102	0.0655741	3.74318e-05	0.51261	2.88125e-05	0.512447	2.87196e-05
10AFK-2 10	15.968	0.189287	0.0770488	0.00117545	0.665252	0.0106921	0.0626254	0.000742374	378.419	4.46778	0.0659126	0.000115982	0.512598	3.79099e-05	0.512434	3.76221e-05
10AFK-2 11	16.1143	0.193999	0.0787324	0.00122215	0.673655	0.0110577	0.0620565	0.000747091	378.82	4.514	0.0621774	2.71797e-05	0.512578	2.74855e-05	0.512423	2.74181e-05
10AFK-2 12	16.1425	0.18851	0.0782423	0.00124635	0.668606	0.0110339	0.0619483	0.000723423	379.366	4.36918	0.0659728	2.93921e-05	0.512589	2.84761e-05	0.512425	2.84032e-05
10AFK-2 13	16.0001	0.177469	0.0762087	0.00111523	0.65703	0.00968078	0.0624998	0.000693234	378.236	4.17362	0.0726335	3.4485e-05	0.512604	2.6378e-05	0.512423	2.62924e-05
10AFK-2 14	15.9214	0.177267	0.0783193	0.00111151	0.678801	0.010089	0.0628084	0.000699299	377.696	4.22962	0.0701131	0.000108071	0.51263	2.864e-05	0.512456	2.83718e-05
10AFK-2 15	15.9227	0.175149	0.0794128	0.00115373	0.6881	0.0103165	0.0628033	0.000690831	378.838	4.19472	0.0711739	3.75976e-05	0.512596	3.02249e-05	0.51242	3.01316e-05
10AFK-2 16	15.9663	0.173695	0.0893041	0.0013658	0.771392	0.0120237	0.0626317	0.00068136	378.005	4.2414	0.0578495	0.000145753	0.512602	3.10491e-05	0.512458	3.06874e-05
10AFK-2 17	16.0073	0.167526	0.084528	0.00133979	0.72807	0.0117642	0.0624717	0.000653806	378.657	4.07681	0.0679119	5.88566e-05	0.512597	3.3669e-05	0.512428	3.35229e-05
10AFK-2 18	15.8799	0.172413	0.0810634	0.00132477	0.703742	0.012023	0.0629727	0.000683716	378.527	4.12962	0.0663058	3.63128e-05	0.512587	3.21197e-05	0.512422	3.20296e-05
