# Supplementary material for: In situsequential U–Pb age and Sm–Nd systematics measurements of natural LREE-enriched minerals using single laser ablation multi-collector inductively coupled plasma mass spectrometry
Source: Royal Society of Chemistry journal article supplement (doi:10.1039/c9ja00346k), 2019-12-09
Supplement: c9ja00346k3.pdf [file c9ja00346k3.pdf]

## Supporting Information

### Detailed descriptions for the depth profiling analysis of the laser pit

The laser pit parameters of three minerals samples, such as diameter and depth, were investigated using a white light inter-ferometric microscope (NewView, Zygo Corporation) at Tsinghua University in Beijing. **Figure 1s a-c** illustrate the craters formed on 10AFK-2 perovskite during a laser ablation of 43 seconds at a spot size of 60  $\mu\text{m}$ , a repetition rate of 6 Hz and a fluence of 5  $\text{J}/\text{cm}^2$ . The depth of acquired laser pit was 27.540  $\mu\text{m}$ , which is smaller than the crater diameter of 61.869  $\mu\text{m}$ . In the analysis process of OLT-1 titanite, with the purpose of improving the sensitive for the lower U, Pb and Nd content, a laser ablation procedure involved a spot size of 90  $\mu\text{m}$ , a repetition rate of 10 Hz and a fluence of 9  $\text{J}/\text{cm}^2$ . The depth of the crater after 43 seconds of laser ablation was 57.848  $\mu\text{m}$ , which smaller than the crater diameter of 96.794  $\mu\text{m}$  (**Figure 1s d-f**). Considering a higher U, Pb and Nd content of the Namaqualand monazite, the laser ablation system was operated at a smaller spot size of 24  $\mu\text{m}$ , a repetition rate of 6 Hz and a fluence of 5  $\text{J}/\text{cm}^2$ . However, a laser ablation of 43 seconds produced a depth of 32.830 $\mu\text{m}$ , which is slightly larger than the crater diameter of 28.021 $\mu\text{m}$  (**Figure 1s g-i**). Therefore, a further experiment was conducted using a larger spot size of 90  $\mu\text{m}$ . The result was represented by **Figure 1s j-l** with the depth of 30.406  $\mu\text{m}$  comparable to the depth of 24  $\mu\text{m}$  spot size. In view of this, a spot size larger than 33  $\mu\text{m}$ , such as 44  $\mu\text{m}$ , should be utilized for the measurement of monazite samples to ensure that the spatial resolution is determined by the laser spot size.

10AFK-2(Perovskite)@60μm, 6Hz

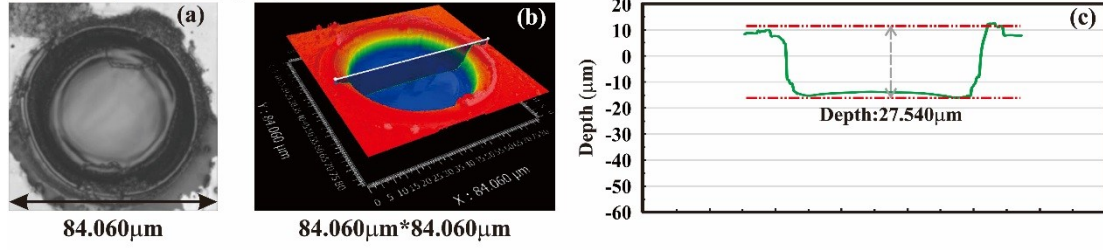

OLT-1(Titanite)@90mm, 10Hz

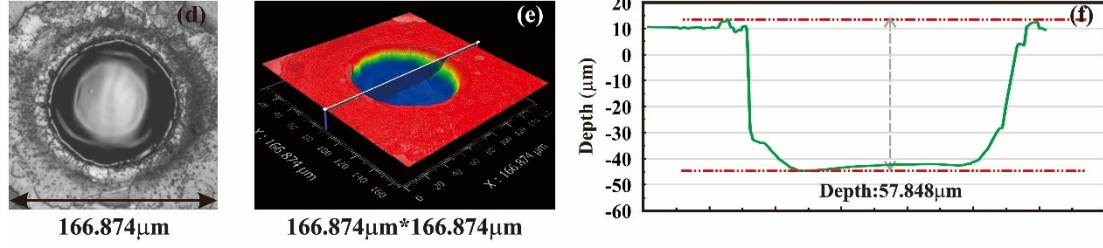

Namaqualand(Monazite)@24mm, 6Hz

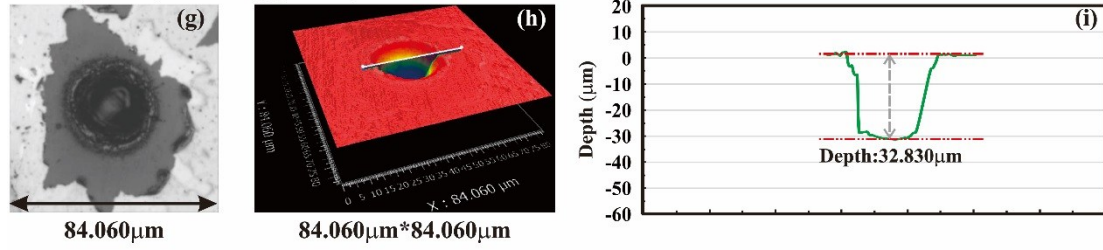

Namaqualand(Monazite)@90μm, 6Hz

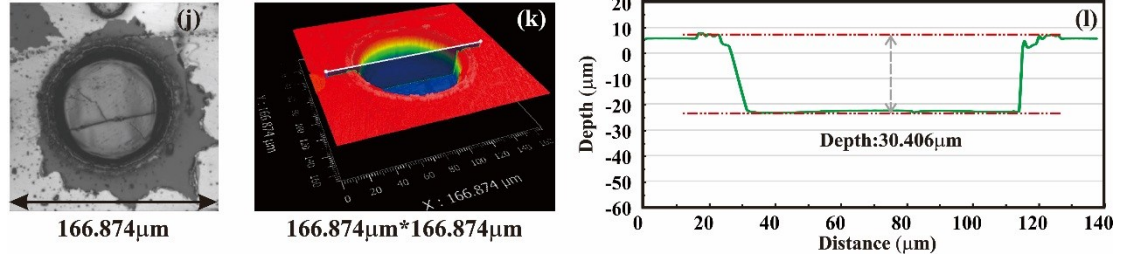

**Figure 1s.** 2D photomicrographs, 3D images and cross-sectional profile of the laser pit characterized by a white light interferometric microscope for (a-c) 10AFK-2 perovskite; (d-f) OLT-1 titanite; (g-i) Namaqualand monazite with spot size of 24μm; (j-l) Namaqualand monazite with spot size of 90μm.
